# Supplementary material for: Selective oxidation of 5-hydroxymethylfurfural to 2,5-diformylfuran with ZnIn2S4 2D nanosheets and atmospheric O2 under visible light
Source: Royal Society of Chemistry journal article supplement (doi:10.1039/d3se00651d), 2023-01-01
Supplement: d3se00651d1.pdf [file d3se00651d1.pdf]

## Selective oxidation of 5-hydroxymethylfurfural to 2, 5-diformylfuran with **ZnIn<sub>2</sub>S<sub>4</sub> 2D nanosheets and atmospheric O<sub>2</sub> under visible light**

Shuoping Ding<sup>a</sup>, José Balena Gabriel Filho<sup>a</sup>, Tim Peppel<sup>a</sup>, Simon Haida<sup>a</sup>, Jabor Rabeah<sup>a</sup>, Norbert Steinfeldt<sup>\*a</sup>,  
Jennifer Strunk<sup>\*ab</sup>

<sup>a</sup>*Leibniz-Institut für Katalyse e. V. (LIKAT), Albert-Einstein-Str. 29a, 18059 Rostock, Germany*

<sup>b</sup>*Technische Universität München, School of Natural Sciences, Lichtenbergstr. 4, 85748 Garching, Germany.*

\*Corresponding author

E-mail: [Norbert.Steinfeldt@catalysis.de](mailto:Norbert.Steinfeldt@catalysis.de) (Norbert Steinfeldt), [Jennifer.Strunk@catalysis.de](mailto:Jennifer.Strunk@catalysis.de) (Jennifer Strunk)

## Experimental

### Chemicals

5-Hydroxymethylfurfural (HMF, >99%), 2, 5-diformylfuran (DFF), and 2-formyl-5-furancarboxylic acid (FFCA) were purchased from endothermic life science molecules. Benzyl alcohol (>99%, Acros Organics) and benzaldehyde (>99.5%, Acros Organics) were utilized for benzyl alcohol oxidation experiment. 4-Chloro-2-nitrophenol (CN, >97%, Sigma Aldrich), p-benzoquinone ( $C_6H_4O_2$ , >98%, Sigma Aldrich), isopropanol ( $C_3H_8O$ , 99.9%, Sigma Aldrich),  $K_2S_2O_8$  ( $\geq 99.0\%$ , Sigma Aldrich), ethylenediaminetetraacetate (EDTA, Sigma Aldrich) were used for scavenger experiment. 5, 5-Dimethyl-1-pyrroline N-oxide (DMPO, Biotechnik GERBU) and 2, 2, 6, 6-Tetramethyl-piperidin (TEMP, Sigma Aldrich) were applied in EPR measurement. Zinc acetate dehydrate ( $Zn(CH_3COO)_2 \cdot 2H_2O$ ,  $\geq 99.5\%$ , Merck), Indium nitrate ( $In(NO_3)_3 \cdot xH_2O$ , Chempur), Thioacetamide (TAA,  $\geq 99.0\%$ , Glentham Life Sciences Ltd), and ethanol ( $CH_3CH_2OH$ ,  $\geq 99.8\%$ , Fisher Chemical), and trisodium citrate dehydrate ( $Na_3C_6H_5O_7 \cdot 2H_2O$ ,  $\geq 99\%$ , Fisher Chemical) were used to synthesize materials. Reagents were analytical grade and directly used without further purification. Deionized water was used throughout all experiment. All chemicals were used as received without further purification.

### Synthesis of $ZnIn_2S_4$ nanosheets

$Zn(CH_3COO)_2 \cdot 2H_2O$  (2.0 mmol, 0.439g),  $In(NO_3)_3 \cdot xH_2O$  (4.0 mmol, 1.203g), TAA (3.2 mmol, 1.202g), and different amount of  $Na_3C_6H_5O_7 \cdot 2H_2O$  (2mmol, 0.6g, 4mmol, 1.2g) were dissolved in 150 mL of  $H_2O$  and stirring for 30 minutes. Then the mixed solution was transferred into a 250 mL Teflon-lined stainless-steel autoclave and maintained at 180 °C for 24 h. After reaction, the products were collected by centrifuged at 8000 rpm and washed with water and ethanol several times. Finally, the photocatalysts were dried at 80 C overnight.

### Synthesis of $ZnIn_2S_4$ without trisodium citrate, $ZnS$ and $In_2S_3$

$Zn(CH_3COO)_2 \cdot 2H_2O$  (2.0 mmol, 0.439g),  $In(NO_3)_3 \cdot xH_2O$  (4.0 mmol, 1.203g), and TAA (3.2 mmol, 1.202g) were dissolved in 75 mL  $H_2O$  and 75mL  $CH_3CH_2OH$  and stirring for 30 minutes. Then the mixed solution was

transferred into a 250 mL Teflon-lined stainless-steel autoclave and maintained at 180 °C for 24 h. After reaction, the photocatalysts were collected by centrifuged at 8000 rpm min<sup>-1</sup> and washed with water and ethanol several times. Finally, the photocatalysts were dried at 80 C for overnight. ZnS was synthesized as the same procedure without addition of In(NO<sub>3</sub>)<sub>3</sub>·XH<sub>2</sub>O. In<sub>2</sub>S<sub>3</sub> was synthesized with the molar ratio of into TAA at 2: 3 (molar ratio of In to TAA was 6).

## **Characterization**

X-ray diffraction (XRD) powder patterns were recorded on a Panalytical X'Pert diffractometer equipped with a linear position sensitive detector (PSD) using automatic divergence slits and Cu Kα1 radiation (40 kV, 40 mA,  $\lambda = 1.5406 \text{ \AA}$ ).

X-ray photoelectron spectroscopy (XPS) measurements were performed in VG ESCALAB220iXL (Thermo Fisher Scientific, USA) with a monochromated Al Kα X-ray radiation source (E= 1486.6 eV).

Brunauer-Emmett-Teller (BET) surface area and porosity were obtained by the N<sub>2</sub> adsorption-desorption isotherms on an ASAP 2020 Micromeritics instrument. All samples were degassed at 100 °C for 3 h to desorb moisture and impurities from their surfaces. The pore size distributions were calculated using the Barrett-Joyner-Halenda (BJH) model from the desorption branch.

UV-vis diffuse reflectance spectra (DRS) were recorded on a AvaSpec 2048 fiber optical spectrometer (Avantes BV, Apeldoorn, Netherlands) equipped with an Ava Light-DHS light source and an FCR-19UV200-2-ME reflection probe by using BaSO<sub>4</sub> as the reference standard material.

Raman spectra were obtained on a inVia Raman microscope (Renishaw, Germany) by loading the material into a sample holder under ambient conditions. The excitation wavelength was 442 nm at a laser power of 5.8 mW.

The morphology and microstructure were observed on a field emission scanning electron microscope (FE-SEM, MERLIN® VP Compact, Co. Zeiss, Oberkochen) and a transmission electron microscope (TEM, JEM-ARM200F, JEOL) operating at an accelerated voltage of 200 kV. The sample was ultrasonically dispersed in ethanol solution, and a drop was deposited on a copper grid covered with a holey carbon membrane for observation.

Electron paramagnetic resonance (EPR) spectra were recorded on an X-band microwave spectrometer (EMX CW, Bruker Biospin GmbH, Rheinstetten, Germany) with a microwave frequency of about 9.7 GHz at room temperature.

X-ray photoelectron spectroscopy (XPS) measurements were performed in VG ESCALAB220iXL (Thermo Fisher Scientific, USA) with a monochromated Al K $\alpha$  X-ray radiation source (E= 1486.6 eV).

### Photocatalytic HMF oxidation experiment

In a typical experiment, the photocatalytic oxidation of HMF was carried out in a homemade photoreactor. 10 mg of sample was dispersed in 2 mL HMF (concentration: 20 mM) of CH<sub>3</sub>CN solution under synthetic Air flowing at 15 °C. The reactor was illuminated with blue LED lamp (maximum wavelength: 467nm) with a light intensity of 25 mW•cm<sup>-2</sup> (Fig. S1). At each 2 h, 50  $\mu$ L of aliquot of the catalytic reaction solution was collected, diluted twenty times with water to 1 mL and analyzed with a high-performance liquid chromatography (HPLC, Agilent 1260) equipped with a 300 mm organic acid resin column with 7.80 mm inner diameter (Rezex ROA-Organic Acid, 00H-0138-K). 2 mM trifluoroacetic acid (TFA) aqueous solution (149  $\mu$ L TFA was dissolved in 1L H<sub>2</sub>O) was used as the mobile phase with a flow rate of 0.6 mL min<sup>-1</sup> at a temperature of 40°C, and the injection volume was 10 $\mu$ L. The furan compounds were detected by a diode array detector (DAD) at 270 nm, and the retention times of FDCA, FFCA, HMFCa, HMF and DFF (HMF and all possible oxidation products, Fig. S2) were around 12.2, 16.8, and 21.6, 36.7, 45.8 min, respectively (Fig. S3). The concentration of furan compounds (FFCA, HMF and DFF) was quantified according to the external standard calibration curves (Fig. S4).

The HMF conversion, and selectivity and the yield of DFF were calculated using Equations (1), (2) and (3):

$$\text{Conversion}(\%) = \frac{C_{\text{HMF initial}} - C_{\text{HMF after reaction}}}{C_{\text{HMF initial}}} \times 100\% \#(1)$$

$$\text{Selectivity}(\%) = \frac{C_{\text{DFF after reaction}}}{C_{\text{HMF initial}} - C_{\text{HMF after reaction}}} \times 100\% \#(2)$$

$$\text{Yield}(\%) = \frac{C_{\text{DFF after reaction}}}{C_{\text{HMF initial}}} \times 100\% \#(3)$$

## **H<sub>2</sub>O<sub>2</sub> measurement**

The hydrogen peroxide concentration was determined by the titanium complex colorimetric method <sup>1,2</sup>. Briefly, 1 mL of the sample was added to 3 mL of acidified solution of ammonium titanate monohydrate (8.33 g/L), the color of the solution turned yellow and maintained for 30s. The absorbance of the peroxo complex formed by the reaction between Ti(IV) and the hydrogen peroxide was measured at 400 nm using an Avantes UV-Vis spectrophotometer model AvaSpec-2048 (equipped with a Ava Light-DH-S-BAL light source and 0.5 cm optical pathway glass fiber probe) and the quantification was made by a linear calibration curve ranging from 0.3 to 4 mM.

## **DMPO and TEMP measurements**

For the tests, a suspension was made in a 2 mL vial by weighing 5 mg of the photocatalyst and adding it to a solution with 100 mM of spin trapping molecule (DMPO to capture radical species and TEMP for <sup>1</sup>O<sub>2</sub>) in acetonitrile, which was previously saturated with oxygen. This suspension was then irradiated by a blue LED, stirred, and aliquots were extracted using 50 μL capillaries, which were placed in an ultrapure quartz tube and inserted into the cavity of the Bruker EMX CW-micro EPR spectrometer (X-band ~ 9.7 GHz). Experiments were also performed in the presence of 20 mM HMF to observe the influence of this substrate. Furthermore, the detection of DMPO-HMF spin adduct was done in the absence of oxygen (bubbling argon in the suspension). Easy spin <sup>3</sup> was used for simulating DMPO spin adducts spectra.

## **Catalytic stability measurement**

For the first run, 40 mg was used in 8 mL HMF (20mM) CH<sub>3</sub>CN solution. After reaction, the catalyst was collected by centrifugation at 8000 rpm to avoid loss and washed by water and ethanol several times. The spent catalyst was dried in an oven at 80 °C and reused for the sequent run. For the second run, 10 mg sample was added to 2 mL HMF CH<sub>3</sub>CN solution with the same concentration of 20mM, and other cycles were repeated with the same procedure by adding small amount of used sample. The stability of the catalyst was also measured by photocatalytic water splitting by extending the reaction time to 25hours.

## Mott-Schottky measurement

The Mott-Schottky measurement was conducted on a Zennium electrochemical (Zahner, Germany) with three electrodes. The working electrode was prepared via a coating method. Briefly, 20 mg sample was dispersed in a mixture of 100  $\mu\text{L}$  Nafion solution (5wt.%) and 900  $\mu\text{L}$  isopropyl alcohol under ultrasonic for 10 min, then the dispersion was dropped on a FTO glass with an active area of  $1.5 \times 1.5 \text{ cm}^2$  and dried naturally in air. Pt wire and Ag/AgCl (3M, NaCl) were used as the counter electrode and the reference electrode, respectively. The electrolyte was sodium sulfate (0.5 M). The Mott-Schottky curves were recorded by electrochemical impedance measurements to obtain the flat-band potential of the photocatalyst.

## Photocatalytic water splitting reaction

Photocatalytic water splitting experiments were performed in a double jacket three neck flasks, and the gas space in the reactor about the liquid phase was only low. Typically, 25 mg of photocatalyst was dispersed in 50 mL of distilled water in absence of any cocatalyst or sacrificial agent. The reaction was performed at 25 °C. Before the lamp was switched on, the solution was purged with Ar for 30 min to minimize the air in the system. Then, the Ar flow was reduced to a constant flow rate of  $2.5 \text{ mL} \cdot \text{min}^{-1}$ . Subsequently, the reactor was exposed under a 300 W Xenon lamp source (LSE341, LOT Quantum Design, wavelength: 300-700nm, light intensity:  $1000 \text{ mW cm}^{-2}$ ) equipped with a  $90^\circ$  deflection reflector system (MS 90) containing a dichroic mirror. The evolved gas was analyzed online each 15 min by gas chromatography (GC) using a thermal conductivity detector (TCD). The  $\text{H}_2$  evolution rate was determined by using the following equation:

$$r_{\text{H}_2}(\mu\text{mol} \cdot \text{h}^{-1}) = \frac{F_{\text{Ar}}(\text{mL} \cdot \text{min}^{-1}) A_{\text{H}_2}^{\text{GC}} * 60000}{f_{\text{H}_2}^{\text{GC}}(1/\text{vol}\%) \cdot 100 \text{vol}\% \cdot M_v(\text{mL} \cdot \text{mmol}^{-1})}$$

$F_{\text{Ar}}$  is the Ar flow rate,  $A_{\text{H}_2}$  is the GC area of the  $\text{H}_2$  peak,  $f_{\text{H}_2}$  is the calibration factor of  $\text{H}_2$  ( $\text{H}_2$  was determined as vol%), and  $M_v$  is the molar volume at 25 °C ( $24.5 \text{ mL} \cdot \text{mmol}^{-1}$ ). Because  $\text{H}_2$  evolution affects the Ar gas flow rate only in a very minor degree, the inlet Ar flow rate was used for the calculation of the hydrogen formation rate. Hydrogen formation with time ( $\mu\text{mol}$ ) was obtained by integrating the hydrogen formation rate over different time periods.

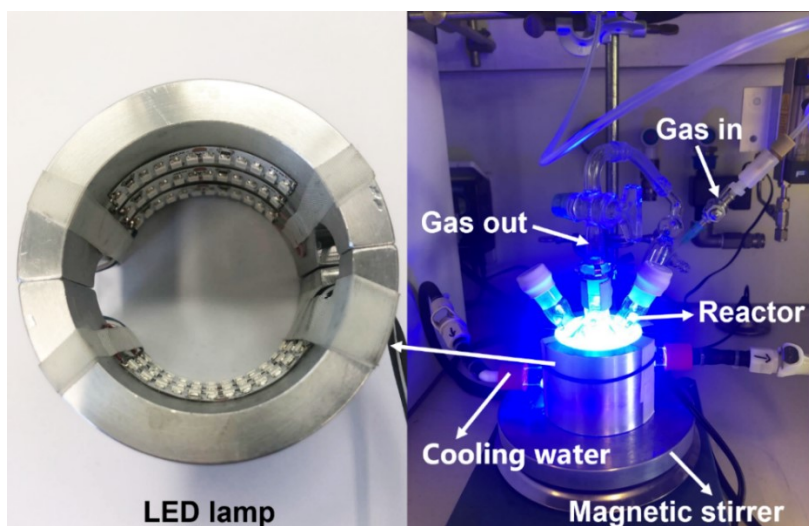

**Fig. S1** Experimental set-up used for HMF oxidation (blue LED light intensity:  $25\text{mW cm}^{-2}$ , maximum wavelength:  $467\text{nm}$ ).

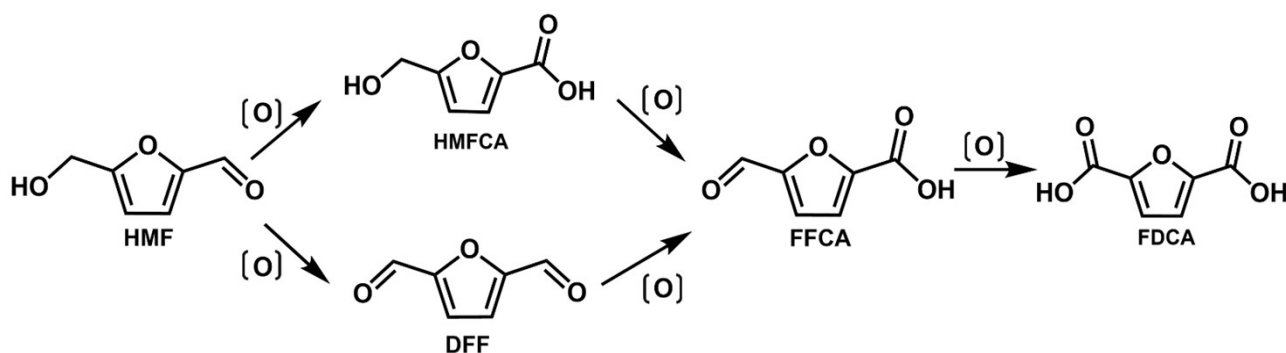

**Fig. S2** Schematic illustration of the potential oxidation products from HMF.

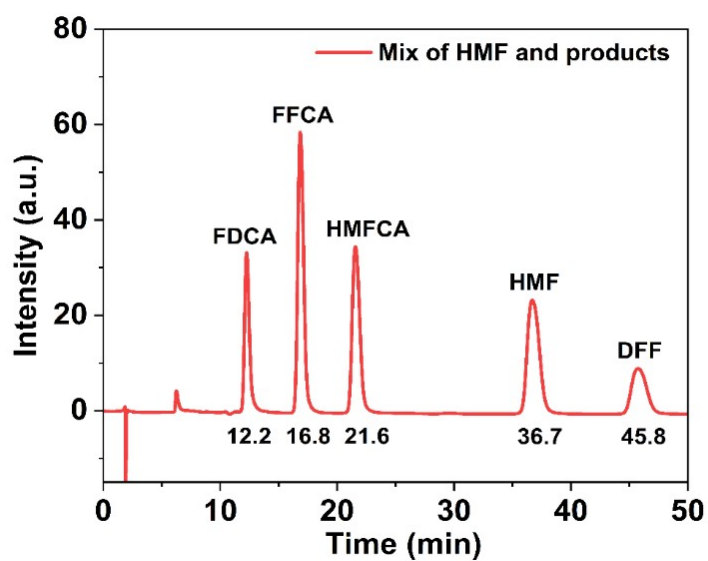

**Fig. S3** HPLC chromatogram of the mixture of HMF and possible oxidation products.

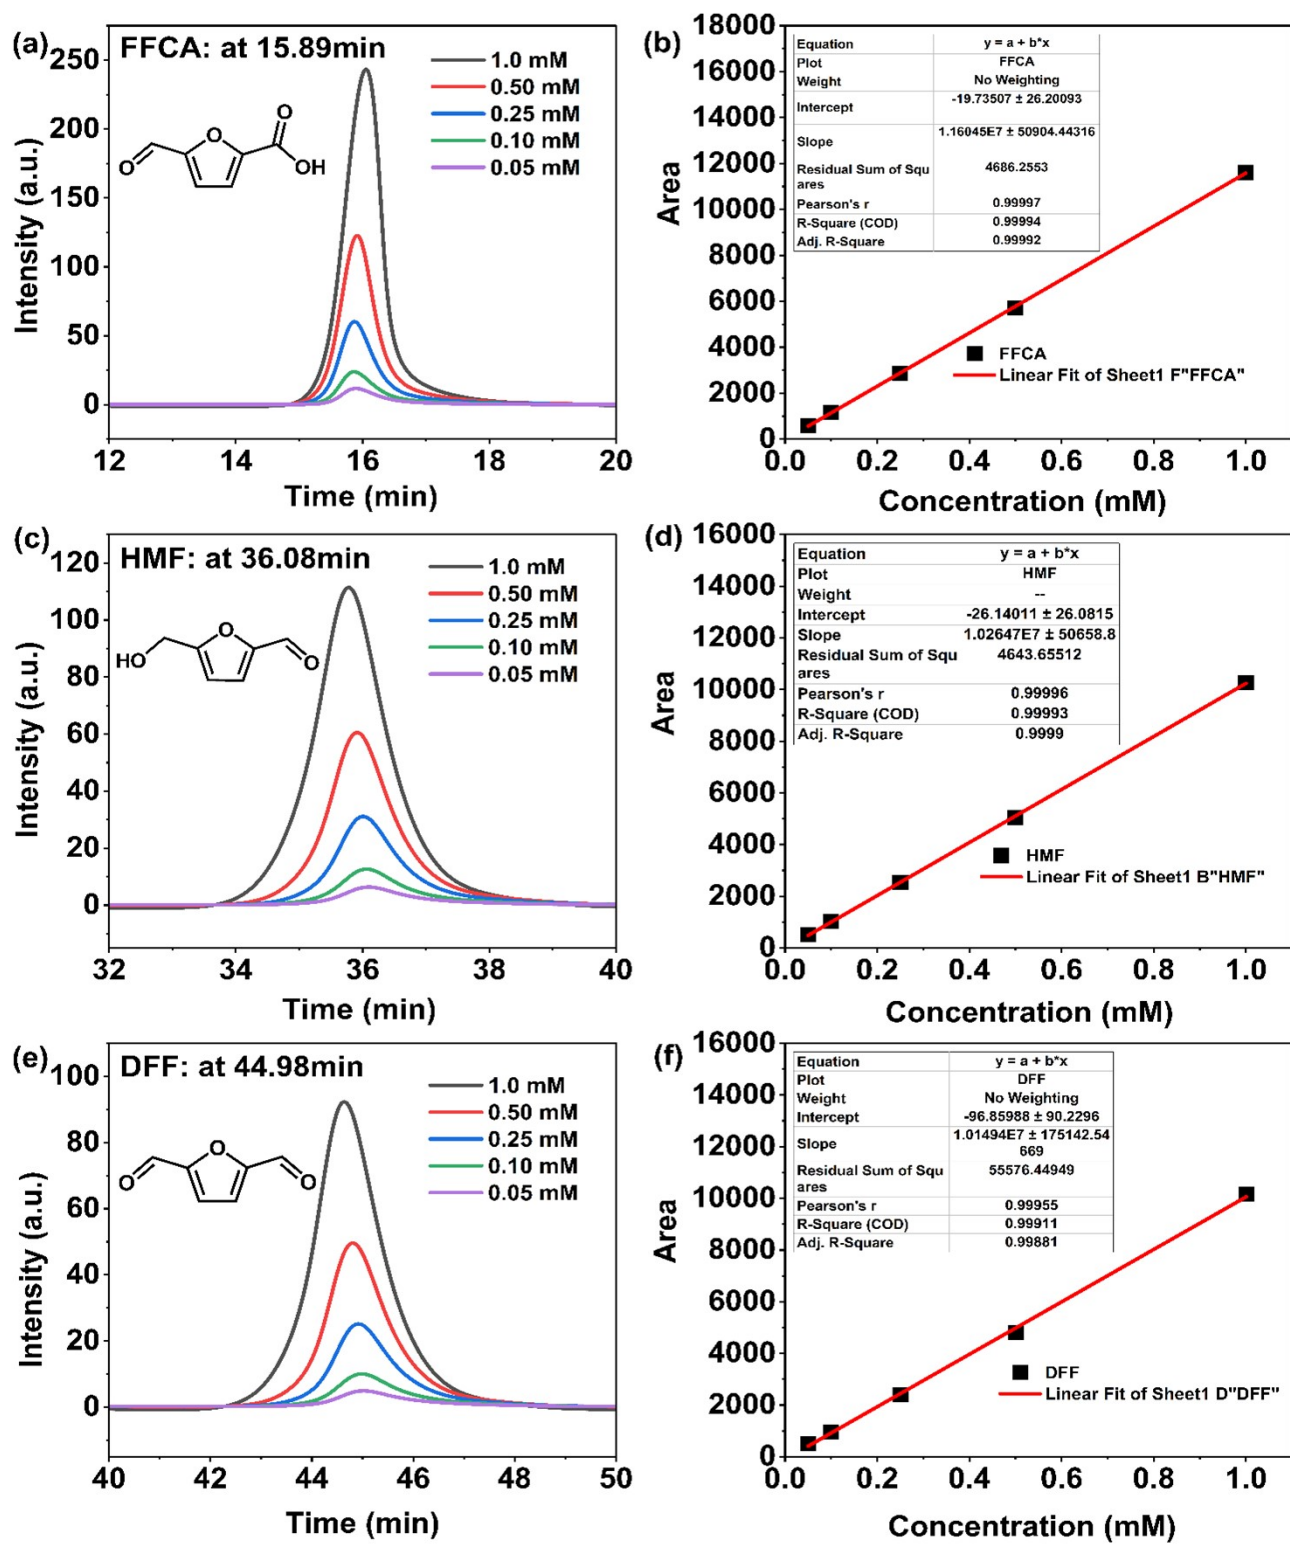

Fig. S4 HPLC chromatograms and calibration curves of FFCA, HMF and DFF.



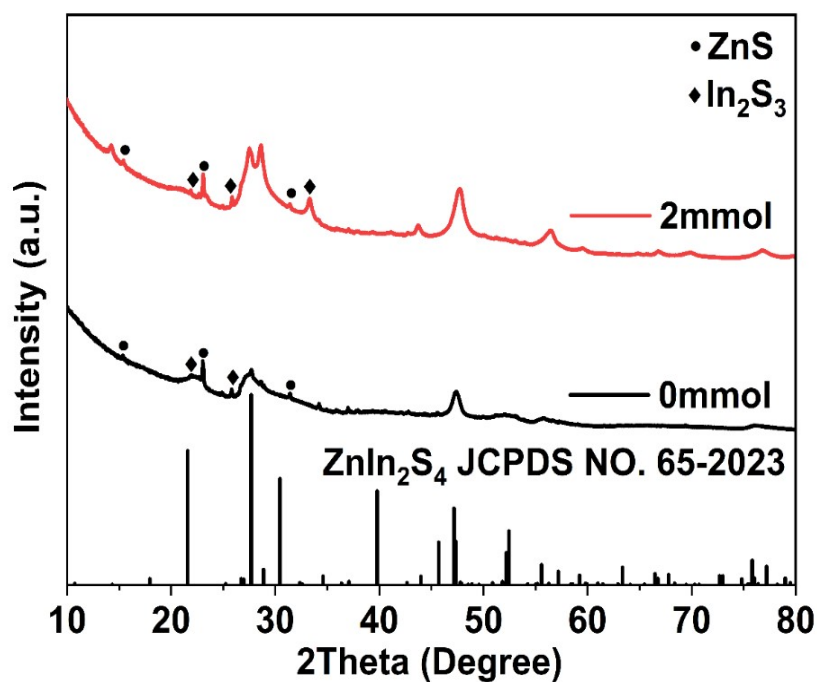

Fig. S5 XRD powder patterns of the sample synthesized without and with 2 mmol trisodium citrate.

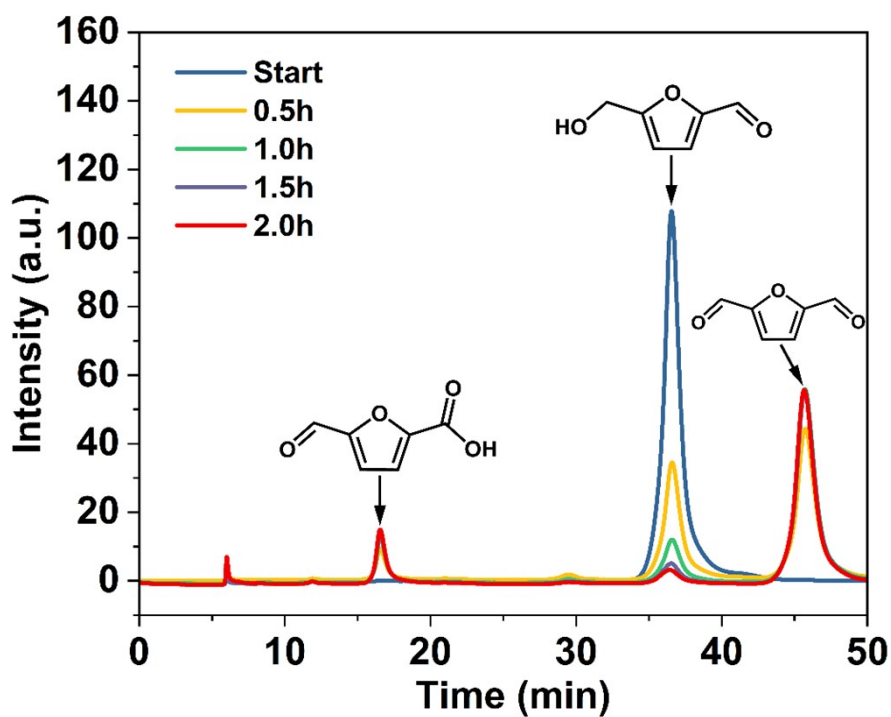

Fig. S6 HPLC chromatogram of reaction mixture during HMF oxidation over ZnIn<sub>2</sub>S<sub>4</sub>. Reaction conditions: 40mg ZnIn<sub>2</sub>S<sub>4</sub>, 20mM HMF, 8mL CH<sub>3</sub>CN, 15 °C, air, blue LED.

**Table S1** Comparison of photocatalysts for oxidation of HMF to DFF.

| Photocatalyst                                                     | Light source             | Solvent                                | HMF concentration (mM) | Time (h) | Conv. (%) | DFF Sel. (%) | DFF Yield (%) | Ref.      |
|-------------------------------------------------------------------|--------------------------|----------------------------------------|------------------------|----------|-----------|--------------|---------------|-----------|
| ZnIn <sub>2</sub> S <sub>4</sub>                                  | Blue LED                 | MeCN                                   | 20.0                   | 1.5      | 95.0      | 70.0         | 66.5          | This work |
| ZnIn <sub>2</sub> S <sub>4</sub>                                  | 300W Xe lamp             | MeCN                                   | 5.0                    | 1        | 91.1      | 99.4         | 90.6          | 4         |
| MAPbBr <sub>3</sub>                                               | Blue LED                 | MeCN                                   | 5.0                    | 10       | 100       | 90 ± 1.2     | 90 ± 1.2      | 5         |
| P-Zn <sub>x</sub> Cd <sub>1-x</sub> S                             | White LED                | water                                  | 16                     | 8        | 40        | 65           | 26            | 6         |
| ZnIn <sub>2</sub> S <sub>4</sub> / Nb <sub>2</sub> O <sub>5</sub> | Simulated solar light    | PhCF <sub>3</sub>                      | 10                     | 3        | 85.5      | 88.3         | 75.5          | 7         |
| SGCN/ Pt                                                          | LED (λ>400 nm)           | DMF                                    | 10.0                   | 48       | 38.4      | >99          | 38.4          | 8         |
| SGH-TiO <sub>2</sub>                                              | Green LED (λ=515 nm)     | MeCN                                   | 1.0                    | 0.5      | 59        | 87           | 52            | 9         |
| Fe (III)/ Bi <sub>2</sub> MoO <sub>6</sub>                        | 500 W Xe lamp (λ>400 nm) | water                                  | 20                     | 8        | 32.6      | 95.3         | 31.1          | 10        |
| Nb <sub>2</sub> O <sub>5</sub> -800                               | Xe lamp (λ>400 nm)       | PhCF <sub>3</sub>                      | 0.1                    | 6        | 19.2      | 90.6         | 17.4          | 11        |
| Water treated g-C <sub>3</sub> N <sub>4</sub>                     | Xe lamp (λ>400 nm)       | MeCN+ PhCF <sub>3</sub>                | 20                     | 6        | 31.2      | 85.6         | 26.7          | 12        |
| WO <sub>3</sub> / g-C <sub>3</sub> N <sub>4</sub>                 | Xe lamp (λ>400 nm)       | MeCN+ PhCF <sub>3</sub>                | 0.1                    | 6        | 27.4      | 87.2         | 23.9          | 13        |
| CTF-Th@SBA-15                                                     | Blue LED (λ=460 nm)      | water                                  | 10                     | 30       | 57        | 99           | 56.4          | 14        |
| Zn <sub>0.5</sub> Cd <sub>0.5</sub> S/ MnO <sub>2</sub>           | 30W white LED            | water                                  | 15.9                   | 24       | 46.6      | 100          | 46.6          | 15        |
| CdS                                                               | Blue LED                 | MeCN/Mn(NO <sub>3</sub> ) <sub>2</sub> | 25                     | 48       | 99        | 99           | 99            | 16        |

**Table S2** Reproducibility of ZnIn<sub>2</sub>S<sub>4</sub> for photocatalytic HMF oxidation.

| Entry   | Conv. (%) | DFF Sel. (%) | DFF Yield (%) | FFCA Sel. (%) | FFCA Yield (%) |
|---------|-----------|--------------|---------------|---------------|----------------|
| 1       | 96.1      | 69.8         | 67.1          | 7.2           | 6.9            |
| 2       | 95.2      | 67.8         | 64.6          | 6.8           | 6.5            |
| 3       | 95.9      | 70.6         | 67.8          | 5.7           | 5.5            |
| Average | 95.7      | 69.4         | 66.5          | 6.6           | 6.3            |

Reaction conditions: 10 mg ZnIn<sub>2</sub>S<sub>4</sub>, 20 mM HMF, 2 mL CH<sub>3</sub>CN, 15 °C, air, 2h, blue LED.

**Table S3** Photocatalytic conversion of HMF to DFF and FFCA over different photocatalysts.

| Entry | Sample                                                    | Conv. (%) | DFF Sel. (%) | DFF Yield (%) | FFCA Sel. (%) | FFCA Yield (%) |
|-------|-----------------------------------------------------------|-----------|--------------|---------------|---------------|----------------|
| 1     | ZnIn <sub>2</sub> S <sub>4</sub> (with sodium citrate)    | 95.7      | 69.4         | 66.5          | 6.6           | 6.3            |
| 2     | ZnIn <sub>2</sub> S <sub>4</sub> (without sodium citrate) | 47.3      | 28.9         | 13.8          | 3.2           | 1.5            |
| 3     | ZnS                                                       | 4.9       | 44.0         | 2.2           | 0             | 0              |
| 4     | In <sub>2</sub> S <sub>3</sub>                            | 5.3       | 47.6         | 2.5           | 0             | 0              |

Reaction conditions: 10 mg photocatalyst, 20 mM HMF, 2 mL CH<sub>3</sub>CN, 15 °C, air, 2h, blue LED.

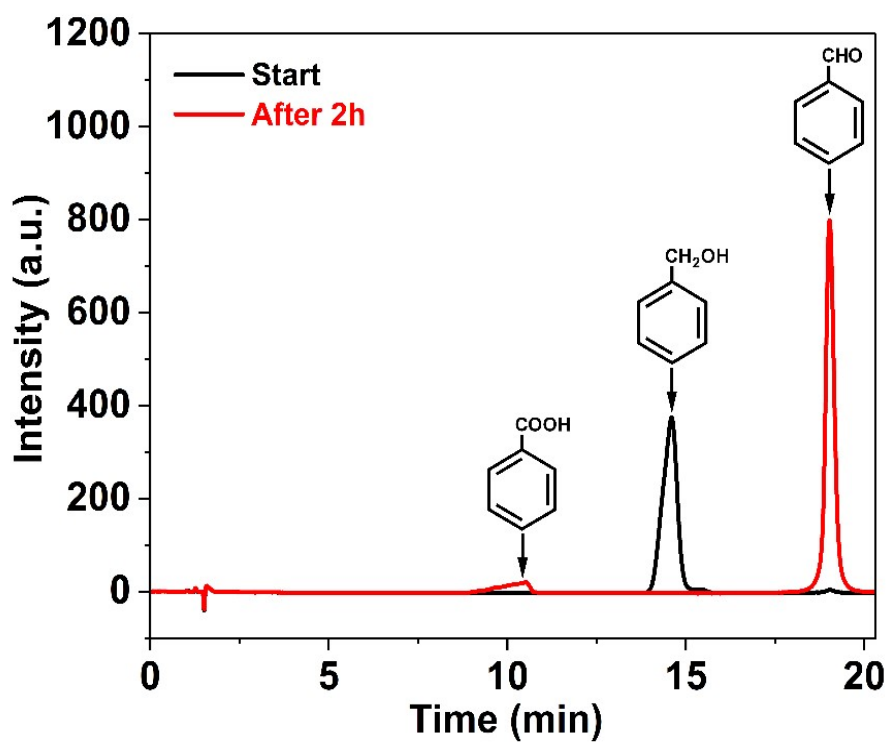

**Fig. S7** HPLC chromatogram of reaction mixture of photocatalytic benzyl alcohol oxidation over ZnIn<sub>2</sub>S<sub>4</sub>. Reaction conditions: 10mg ZnIn<sub>2</sub>S<sub>4</sub>, 20mM benzyl alcohol, 2 mL CH<sub>3</sub>CN, 15 °C, air, blue LED.

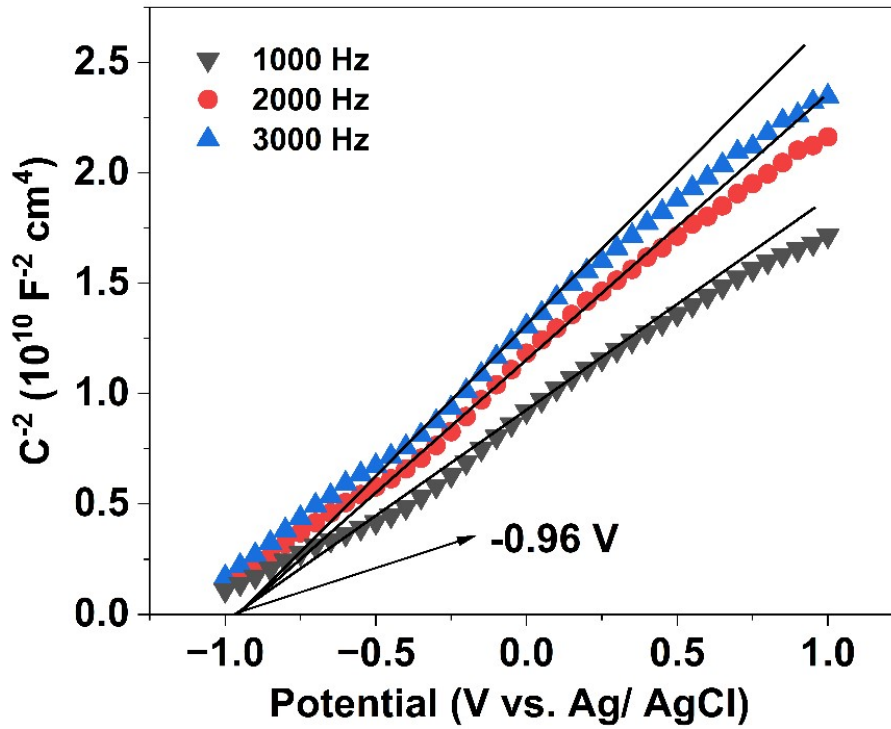

Fig. S8 The Mott-Schottky curve of ZnIn<sub>2</sub>S<sub>4</sub>.

$$E_{\text{FB}} (\text{flat band potential}) = -0.96 \text{ V}$$

$$E_{\text{CB}} (\text{conduction band minimum}) = -1.06 \text{ V}, E_{\text{CB}} \text{ is } 0.1 \text{ V more negative than } E_{\text{FB}}$$

$$E_{\text{CB}} (\text{NHE}) = E_{\text{CB}} + 0.059 \text{ pH} + E_{\text{Ag/AgCl}}^{\circ}$$

$$E_{\text{Ag/AgCl}}^{\circ} = 0.209 \text{ V}$$

$$E_{\text{CB}} (\text{NHE}) = E_{\text{CB}} + 0.059 \text{ V pH} + 0.209 \text{ V}$$

$$E_{\text{CB}} (\text{NHE}) = -1.06 \text{ V} + 0.059 \text{ V} * 7 + 0.209 \text{ V} = -0.44 \text{ V}$$

$$E_{\text{VB}} (\text{NHE}) = E_{\text{CB}} (\text{NHE}) + E_{\text{g}} (\text{band gap energy, } 2.63 \text{ eV})$$

Therefore, the CB (conduction band) minimum and the VB (valence band) maximum potentials of ZnIn<sub>2</sub>S<sub>4</sub> (pH=0) were calculated to be -0.44 V and +2.19 V, respectively.

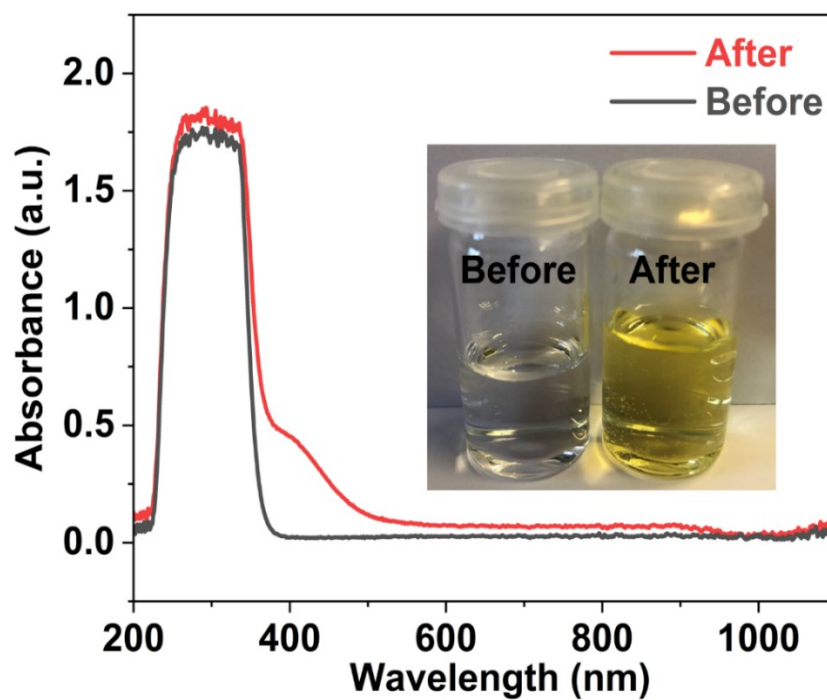

**Fig. S9** UV-vis spectra of the solution after adding ammonium titanyl oxalate monohydrate. Reaction conditions: 10mg  $\text{ZnIn}_2\text{S}_4$ , 20mM HMF, 2mL  $\text{CH}_3\text{CN}$ , 15 °C, air, blue LED.

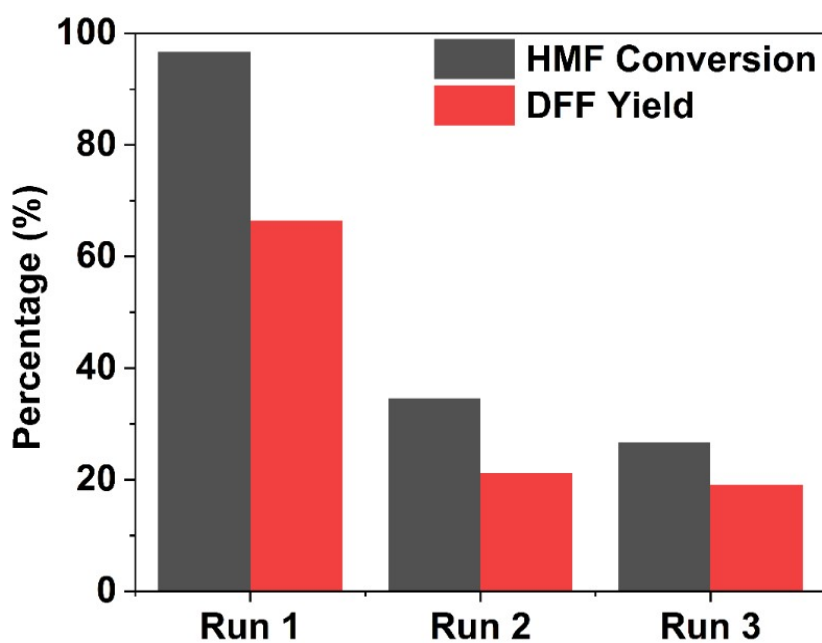

**Fig. S10** Photocatalytic HMF oxidation stability measurement of  $\text{ZnIn}_2\text{S}_4$ . Reaction conditions: 10mg  $\text{ZnIn}_2\text{S}_4$ , 20mM HMF, 2mL  $\text{CH}_3\text{CN}$ , 15 °C, air, blue LED.

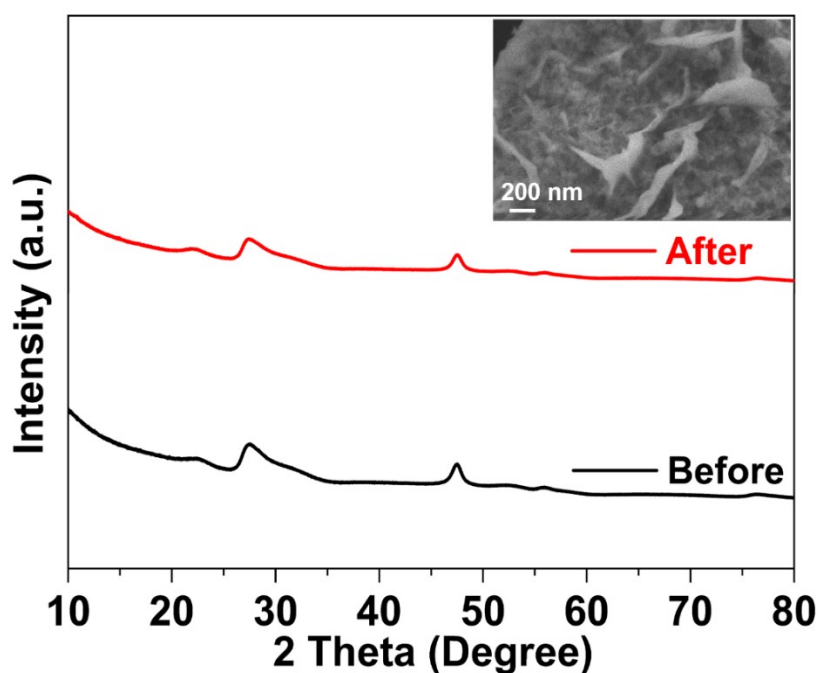

Fig. S11 XRD powder patterns and (b) the corresponding SEM image of ZnIn<sub>2</sub>S<sub>4</sub> after cycling stability test.

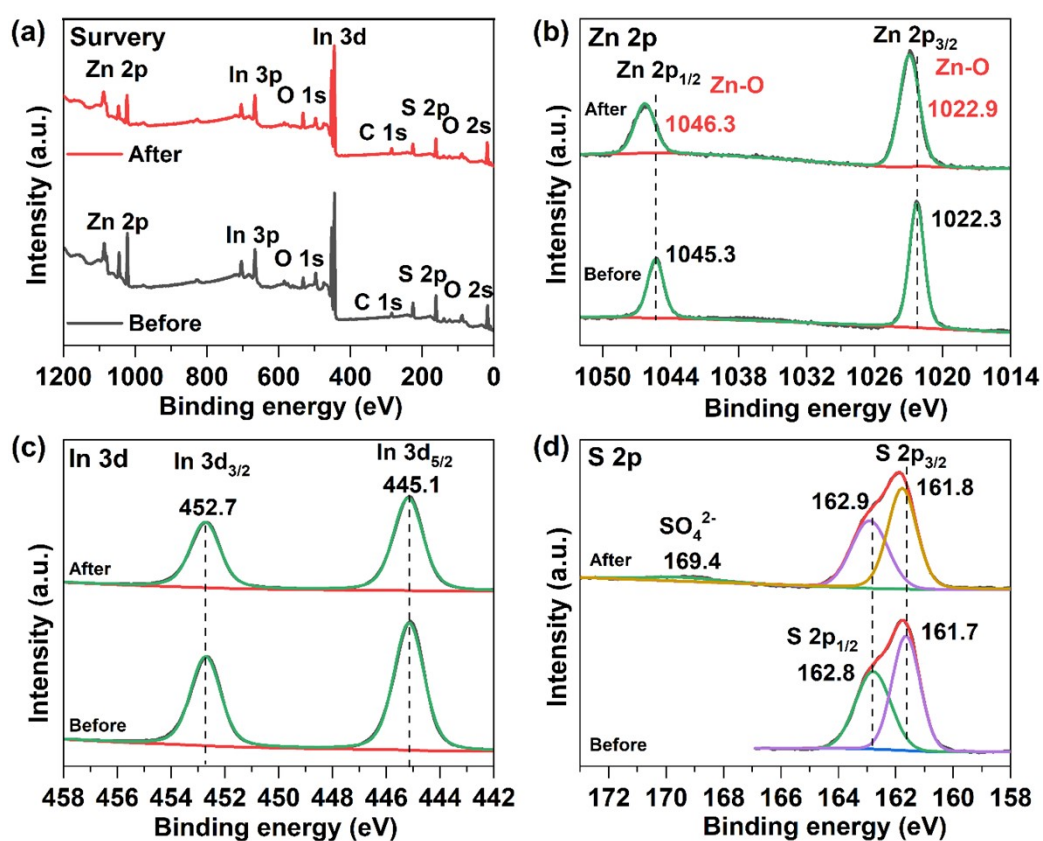

Fig. S12 XP spectra of ZnIn<sub>2</sub>S<sub>4</sub> before and after cycling experiment: (a) Survey, (b) Zn 2p, (c) In 3d, and (d) S2p.

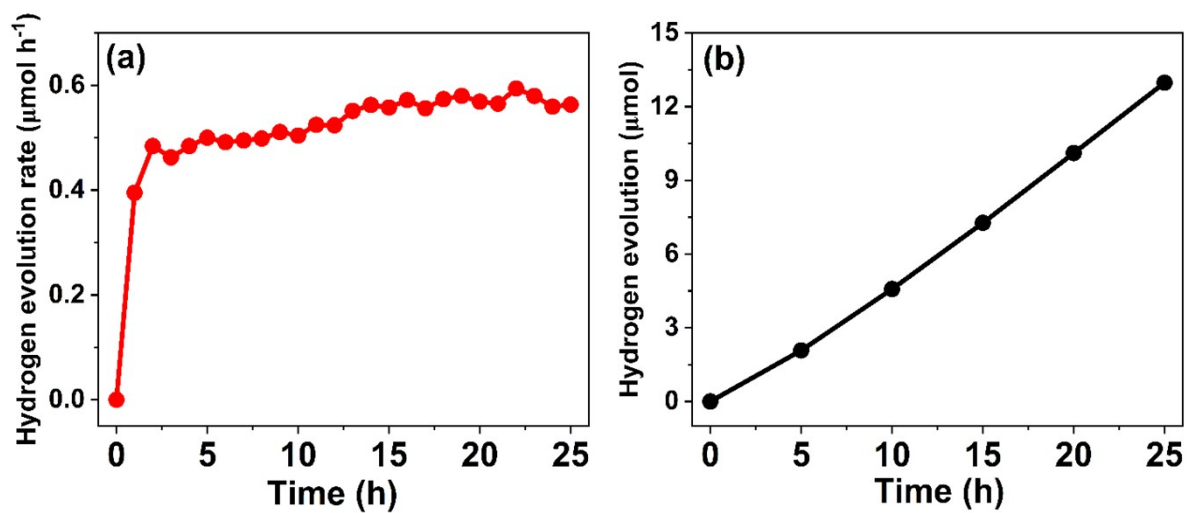

**Fig. S13** (a) Photocatalytic H<sub>2</sub> evolution rate of ZIS, and (b) results of a long-term experiment under white light irradiation using ZIS in pure water without co-catalyst and sacrificial agent.

## References

1. R. M. Sellers, *Analyst*, 1980, **105**, 950-954.
2. M. A. da Silva, I. F. Silva, Q. Xue, B. T. Lo, N. V. Tarakina, B. N. Nunes, P. Adler, S. K. Sahoo, D. W. Bahnemann and N. López-Salas, *Appl. Catal. B: Environ.*, 2022, **304**, 120965.
3. S. Stoll and A. Schweiger, *J. Magn. Reson.*, 2006, **178**, 42-55.
4. H. Zhao, D. Trivedi, M. Roostaeinia, X. Yong, J. Chen, P. Kumar, J. Liu, B.-L. Su, S. Larter and M. G. Kibria, *Green Chem.*, 2023, **25**, 692-699.
5. M. Zhang, Z. Li, X. Xin, J. Zhang, Y. Feng and H. Lv, *ACS Catal.*, 2020, **10**, 14793-14800.
6. H.-F. Ye, R. Shi, X. Yang, W.-F. Fu and Y. Chen, *Appl. Catal. B: Environ.*, 2018, **233**, 70-79.
7. Y. Wang, X. Kong, M. Jiang, F. Zhang and X. Lei, *Inorg. Chem. Front.*, 2020, **7**, 437-446.
8. V. R. Battula, A. Jaryal and K. Kailasam, *J. Mater. Chem. A*, 2019, **7**, 5643-5649.
9. A. Khan, M. Goepel, A. Kubas, D. Łomot, W. Lisowski, D. Lisovytskiy, A. Nowicka, J. C. Colmenares and R. Gläser, *ChemSusChem*, 2021, **14**, 1351-1362.
10. J. Xue, C. Huang, Y. Zong, J. Gu, M. Wang and S. Ma, *Appl. Organomet. Chem.*, 2019, **33**, e5187.
11. H. Zhang, Q. Wu, C. Guo, Y. Wu and T. Wu, *ACS Sustain. Chem. Eng.*, 2017, **5**, 3517-3523.
12. Q. Wu, Y. He, H. Zhang, Z. Feng, Y. Wu and T. Wu, *Mol. Catal.*, 2017, **436**, 10-18.
13. H. Zhang, Z. Feng, Y. Zhu, Y. Wu and T. Wu, *J. Photochem. Photobiol. A*, 2019, **371**, 1-9.
14. C. Ayed, W. Huang, G. Kizilsavas, K. Landfester and K. A. Zhang, *ChemPhotoChem*, 2020, **4**, 571-576.
15. S. Dhingra, T. Chhabra, V. Krishnan and C. Nagaraja, *ACS Appl. Energy Mater.*, 2020, **3**, 7138-7148.
16. J. L. DiMeglio, A. G. Breuhaus-Alvarez, S. Li and B. M. Bartlett, *ACS Catal.*, 2019, **9**, 5732-5741.
